# Supplementary material
Source: publisher site journal article supplement (https://www.dovepress.com/article/603312)
Supplement: Supplementary file 1 [file 603312%20Supplementary%20Tables.docx]

**Supplementary Table 1.** Operational definition of rheumatic diseases in this study

| Rheumatic diseases | ICD-10 code | RIDR code | Additional criteria |
| --- | --- | --- | --- |
| RA 12 | M05 or M06 |  | Prescription of conventional or biologic disease-modifying anti-rheumatic drugs within one year of diagnosis |
| SS 13 | M35 | V139 |  |
| SLE 14 | M32 | V136 |  |
| APS 15 | D68.6 | V253 | Prescription of anticoagulants (aspirin, warfarin, and heparin) more than 180 days |
| Palindromic rheumatism 16 | M12.3 |  | More than 3 times of outpatient visits or more than one time of hospitalization |
| SSc 13 | M34 | V138 |  |
| MCTD 13 | M35.1 | V139 |  |
| Behcet’s disease 17 | M35.2 | V139 |  |
| PMR 13 | M35.3 | V139 |  |
| IIM 13 | M33.2, M33.9, or M33.1 | V137 |  |
| Systemic vasculitis 13,18-20 | 1) M31.3, M31.4, M31.5, or M31.6  2) M31.7  3) M30.0 or M30.1 | 1) V135  2) V 238  3) V134 |  |
| AOSD 21 | M06.1 |  |  |
| AS 22 | M45 | V140 |  |
| PsA 13 | M07 | V137 |  |
| Relapsing polychondritis 13 | M94.1 | V139 |  |

**Notes:** Each disease was defined as cases that fulfilled all of the following: the specified ICD-10 code, the RIDR code, and the additional criteria. If only the ICD-10 and RIDR codes were available, the presence of both was considered sufficient for case definition. Systemic vasculitis was defined as meeting any one of the three criteria (1, 2, or 3).

**Abbreviations:** RA, rheumatoid arthritis; SS, Sjogren syndrome; SLE, systemic lupus erythematosus; APS, anti-phospholipid antibody syndrome; SSc, systemic sclerosis; MCTD, mixed connective tissue disease;, PMR, polymyalgia rheumatica; IIM, idiopathic inflammatory myopathies; AOSD, Adult onset Still’s disease; AS, ankylosing spondylitis; PsA, psoriatic arthritis.

**Supplementary Table 2** Comparison of clinical parameters according to the screening optical coherence tomography status

| Variable | Screening OCT test (n=2,135) | No screening OCT test (n=17,741) | p-value* |
| --- | --- | --- | --- |
| Female, n (%) | 330 (15.5) | 15,150 (85.4) | 0.294 |
| Age, year, mean ± SD | 53.2 ± 16 | 50.9 ± 14.9 | <0.001 |
| Type of hospital, n (%) |  |  |  |
| Others, n (%) | 436 (20.4) | 5,669 (32) | <0.001 |
| Tertiary/general hospital, n (%) | 1,699 (79.6) | 12,072 (68.1) |  |
| Department |  |  |  |
| Rheumatology, n (%) | 1,352 (63.3) | 9,670 (54.5) | <0.001 |
| Year at HCQ start, n (%) |  |  |  |
| 2014, n (%) | 107 (5) | 3,877 (21.9) | <0.001 |
| 2015, n (%) | 302 (14.2) | 3,438 (19.4) |  |
| 2016, n (%) | 473 (22.2) | 3,481 (19.6) |  |
| 2017, n (%) | 568 (26.6) | 3,576 (20.2) |  |
| 2018, n (%) | 685 (32.1) | 3,369 (19) |  |
| Starting dose of HCQ, mg, mean ± SD | 271.2 ± 110.5 | 286.2 ± 108.1 | <0.001 |
| Diagnosis, n (%) |  |  |  |
| RA, n (%) | 1,248 (58.5) | 12,064 (68) | <0.001 |
| SS, n (%) | 462 (21.6) | 3,428 (19.3) | 0.011 |
| SLE, n (%) | 602 (28.2) | 3,250 (18.3) | <0.001 |
| APS, n (%) | 83 (3.9) | 580 (3.3) | 0.133 |
| Palindromic rheumatism, n (%) | 41 (1.9) | 559 (3.2) | 0.002 |
| SSc, n (%) | 63 (3) | 493 (2.8) | 0.649 |
| MCTD, n (%) | 24 (1.1) | 275 (1.6) | 0.127 |
| Behcet’s disease, n (%) | 32 (1.5) | 320 (1.8) | 0.313 |
| PMR, n (%) | 39 (1.8) | 239 (1.4) | 0.075 |
| IIM, n (%) | 28 (1.3) | 235 (1.3) | 0.96 |
| Systemic vasculitis, n (%) | 6 (0.3) | 47 (0.3) | 0.892 |
| AOSD, n (%) | 6 (0.3) | 44 (0.3) | 0.774 |
| AS, n (%) | 4 (0.2) | 37 (0.2) | 0.838 |
| PsA, n (%) | 0 (0) | 13 (0.1) | 0.681 |
| Relapsing polychondritis, n (%) | 0 (0) | 1 (0) | 0.91 |
| Concomitant medication, n (%) |  |  |  |
| csDMARDs | 396 (18.6) | 4,189 (23.6) | <0.001 |
| Immunosuppressants | 257 (12) | 1,412 (8) | <0.001 |
| Glucocorticoids | 1,543 (72.3) | 13,135 (74) | 0.079 |
| Biological agents | 5 (0.2) | 40 (0.2) | 0.936 |
| Tamoxifen | 0 (0) | 20 (0.1) | 0.61 |
| Comorbidities, n (%) |  |  |  |
| Diabetes mellitus, n (%) | 582 (27.3) | 3,421 (19.3) | <0.001 |
| Hypertension, n (%) | 818 (38.3) | 5,341 (30.1) | <0.001 |
| Dyslipidemia, n (%) | 1,259 (59) | 9,729 (54.8) | <0.001 |
| COPD, n (%) | 538 (25.2) | 3,643 (20.5) | <0.001 |
| Liver disease, n (%) | 860 (40.3) | 6,537 (36.9) | 0.002 |
| Malignancy, n (%) | 140 (6.6) | 910 (5.1) | 0.005 |
| CKD, n (%) | 79 (3.7) | 299 (1.7) | <0.001 |
| CCI score, n (%) |  |  |  |
| 0, n (%) | 80 (3.8) | 709 (4) | <0.001 |
| 1, n (%) | 471 (22.1) | 4,763 (26.9) |  |
| 2, n (%) | 535 (25.1) | 5,056 (28.5) |  |
| 3, n (%) | 388 (18.2) | 3,432 (19.4) |  |
| 4, n (%) | 259 (12.1) | 1,836 (10.4) |  |
| 5, n (%) | 167 (7.8) | 935 (5.3) |  |
| ≥ 6, n (%) | 235 (11) | 1,010 (5.7) |  |

**Notes:** *p-values were calculated using the Student’s t-test (or Mann-Whitney U test) for continuous variables and the Chi-square test (or Fisher's exact test) for categorical variables.

**Abbreviations:** OCT, optical coherence tomography; SD, standard deviation; HCQ hydroxychloroquine; RA, rheumatoid arthritis; SS, Sjogren syndrome; SLE, systemic lupus erythematosus; APS, anti-phospholipid antibody syndrome; SSc, systemic sclerosis; MCTD, mixed connective tissue disease; PMR, polymyalgia rheumatica; IIM, idiopathic inflammatory myopathies; AOSD, Adult onset Still’s disease; AS, ankylosing spondylitis; PsA, psoriatic arthritis; csDMARDs, conventional synthetic disease modifying anti-rheumatic drugs; COPD, chronic obstructive lung disease; CKD, chronic kidney disease; CCI, Charlson Comorbidity Index.

**Supplementary Table 3** Associated factors for undergoing baseline screening optical coherence tomography analyzed by logistic regression models

|  | Univariable model | | Multivariable model 1* | | Multivariable model 2** | |
| --- | --- | --- | --- | --- | --- | --- |
| Variable | Crude OR (95% CI) | p-value*** | Adjusted OR (95% CI) | p-value*** | Adjusted OR (95% CI) | p-value*** |
| Gender |  |  |  |  |  |  |
| Male | Ref |  | Ref |  | Ref |  |
| Female | 0.94 (0.83-1.06) | 0.294 | 0.96 (0.84-1.1) | 0.587 | 0.95 (0.84-1.09) | 0.481 |
| Age per 10 years increase | 1.11 (1.07-1.14) | <0.001 | 1.12 (1.08-1.16) | <0.001 | 1.13 (1.09-1.17) | <0.001 |
| Type of hospital |  |  |  |  |  |  |
| Others | Ref |  | Ref |  | Ref |  |
| Tertiary/general hospital | 1.83 (1.64-2.04) | <0.001 | 1.53 (1.32-1.76) | <0.001 | 1.55 (1.35-1.78) | <0.001 |
| Department |  |  |  |  |  |  |
| Non-rheumatology | Ref |  | Ref |  | Ref |  |
| Rheumatology | 1.44 (1.31-1.58) | <0.001 | 1.08 (0.96-1.21) | 0.183 | 1.06 (0.95-1.19) | 0.312 |
| Year at HCQ start |  |  |  |  |  |  |
| 2014 | Ref |  | Ref |  | Ref |  |
| 2015 | 3.18 (2.54-3.99) | <0.001 | 3.1 (2.47-3.89) | <0.001 | 3.09 (2.47-3.88) | <0.001 |
| 2016 | 4.92 (3.97-6.10) | <0.001 | 4.61 (3.72-5.73) | <0.001 | 4.61 (3.71-5.72) | <0.001 |
| 2017 | 5.75 (4.66-7.11) | <0.001 | 5.31 (4.29-6.57) | <0.001 | 5.30 (4.28-6.57) | <0.001 |
| 2018 | 7.37 (5.98-9.08) | <0.001 | 6.69 (5.41-8.27) | <0.001 | 6.73 (5.45-8.31) | <0.001 |
| Starting dose of HCQ |  |  |  |  |  |  |
| > 300mg | Ref |  | Ref |  | Ref |  |
| ≤ 300mg | 1.52 (1.38-1.67) | <0.001 | 1.21 (1.09-1.34) | <0.001 | 1.22 (1.10-1.35) | <0.001 |
| Diagnosis |  |  |  |  |  |  |
| RA | 0.66 (0.60-0.73) | <0.001 | 0.94 (0.84-1.06) | 0.344 | 0.93 (0.82, 1.05) | 0.26 |
| SS | 1.15 (1.03-1.29) | 0.011 | 1.04 (0.91-1.20) | 0.54 | 1.05 (0.92-1.21) | 0.459 |
| SLE | 1.75 (1.58-1.94) | <0.001 | 1.70 (1.47-1.96) | <0.001 | 1.69 (1.45, 1.96) | <0.001 |
| APS | 1.2 (0.95-1.51) | 0.133 | - |  | - |  |
| Palindromic rheumatism | 0.6 (0.44-0.83) | 0.002 | 0.89 (0.64-1.24) | 0.488 | 0.88 (0.63-1.23) | 0.452 |
| SSc | 1.06 (0.82-1.39) | 0.649 | - |  | - |  |
| MCTD | 0.72 (0.47-1.1) | 0.129 | - |  | - |  |
| Behcet’s disease | 0.83 (0.57-1.19) | 0.314 | - |  |  |  |
| PMR | 1.36 (0.97-1.92) | 0.075 | 1.03 (0.72-1.48) | 0.858 | 1.05 (0.73-1.51) | 0.789 |
| IIM | 0.99 (0.67-1.47) | 0.96 | - |  | - |  |
| Systemic vasculitis | 1.06 (0.45-2.49) | 0.889 | - |  | - |  |
| AOSD | 1.13 (0.48-2.66) | 0.774 | - |  | - |  |
| AS | 0.9 (0.32-2.52) | 0.838 | - |  | - |  |
| PsA | 0 (0-999) | 0.938 |  |  |  |  |
| Relapsing polychondritis | 0 (0-999) | 0.962 | - |  | - |  |
| Concomitant medication |  |  |  |  |  |  |
| cDMARDs | 0.74 (0.66-0.83) | <0.001 | 0.92 (0.81-1.05) | 0.205 | 0.92 (0.81-1.05) | 0.207 |
| Immunosuppressant | 1.58 (1.37-1.82) | <0.001 | 1.22 (1.04-1.42) | 0.012 | 1.23 (1.06-1.44) | 0.008 |
| Glucocorticoid | 0.91 (0.83-1.01) | 0.08 | 0.9 (0.8-1) | 0.047 | 0.89 (0.8-0.99) | 0.04 |
| Biologics | 1.04 (0.41-2.64) | 0.935 | - |  | - |  |
| Tamoxifen | 0 (0-999) | 0.9484 | - |  | - |  |
| Comorbidities |  |  |  |  |  |  |
| Diabetes mellitus | 1.57 (1.42-1.74) | <0.001 | 1.32 (1.18-1.48) | <0.001 | - |  |
| Hypertension | 1.44 (1.31-1.58) | <0.001 | 1.11 (1.00-1.24) | 0.057 | - |  |
| Dyslipidemia | 1.18 (1.08-1.30) | <0.001 | 1.08 (0.97-1.20) | 0.173 | - |  |
| COPD | 1.3 (1.17-1.45) | <0.001 | 1.12 (1-1.25) | 0.048 | - |  |
| Liver disease | 1.16 (1.05-1.27) | 0.002 | 1 (0.9-1.11) | 0.966 | - |  |
| Malignancy | 1.3 (1.08-1.56) | 0.005 | 1.08 (0.89-1.31) | 0.427 | - |  |
| CKD | 2.24 (1.74-2.88) | <0.001 | 1.4 (1.07-1.82) | 0.014 | - |  |
| CCI score |  |  |  |  |  |  |
| 0 | Ref |  | - |  | Ref |  |
| 1 | 0.88 (0.68, 1.13) | 0.301 | - |  | 1.01 (0.77, 1.32) | 0.967 |
| 2 | 0.94 (0.73, 1.2) | 0.611 | - |  | 1.09 (0.83, 1.44) | 0.527 |
| 3~5 | 1.16 (0.91, 1.48) | 0.222 | - |  | 1.24 (0.95, 1.63) | 0.12 |
| ≥ 6 | 2.06 (1.57, 2.7) | <0.001 | - |  | 1.87 (1.38, 2.53) | <0.001 |

**Notes:** * Estimated using multivariable regression models including gender, age, type of hospital, year at start, daily dose of HCQ at start, department, RA, SLE, SS, PMR, palindromic rheumatism, csDMARDs, immunosuppressant, glucocorticoid, diabetes mellitus, hypertension, COPD, liver disease, malignancy, and CKD. ** Estimated using multivariable regression models including gender, age, type of hospital, year at start, daily dose of HCQ at start, department, RA, SLE, SS, PMR, palindromic rheumatism, csDMARDs, immunosuppressant, glucocorticoid, and CCI score. ***p-values were derived from univariable or multivariable logistic regression models.

**Abbreviations:** OR, odds ratio; CI, confidence interval; HCQ, hydroxychloroquine; RA, rheumatoid arthritis; SS, Sjogren syndrome; SLE, systemic lupus erythematosus; APS, anti-phospholipid antibody syndrome; SSc, systemic sclerosis; MCTD, mixed connective tissue disease; PMR, polymyalgia rheumatica; IIM, idiopathic inflammatory myopathies; AOSD, Adult onset Still’s disease; AS, ankylosing spondylitis; PsA, psoriatic arthritis; csDMARDs, conventional synthetic disease modifying anti-rheumatic drugs; COPD, chronic obstructive lung disease; CKD, chronic kidney disease; CCI, Charlson Comorbidity Index.

**Supplementary Table 4** Results of univariable Cox regression models for predicting risk of hydroxychloroquine discontinuation

|  | Univariable model | |
| --- | --- | --- |
| Variable | Crude HR  (95% CI) | p-value* |
| Screening ophthalmic test (either fundoscopy or OCT) | 0.86 (0.83-0.89) | <0.001 |
| Screening OCT only | 0.83 (0.79-0.88) | <0.001 |
| Gender |  |  |
| Male | Ref |  |
| Female | 0.83 (0.79-0.86) | <0.001 |
| Age per 10 years increase | 1.09 (1.08-1.1) | <0.001 |
| Type of hospital |  |  |
| Others | Ref |  |
| Tertiary/general hospital | 0.64 (0.62-0.66) | <0.001 |
| Department |  |  |
| Non-rheumatology | Ref |  |
| Rheumatology | 0.75 (0.72-0.77) | <0.001 |
| Year at HCQ start |  |  |
| 2014 | Ref |  |
| 2015 | 0.92 (0.88-0.97) | <0.001 |
| 2016 | 0.92 (0.88-0.97) | 0.002 |
| 2017 | 0.88 (0.84-0.92) | <0.001 |
| 2018 | 0.83 (0.79-0.88) | <0.001 |
| Starting dose of HCQ |  |  |
| > 300mg | Ref |  |
| ≤ 300mg | 0.98 (0.95-1.01) | 0.175 |
| Diagnosis |  |  |
| RA | 1.59 (1.54-1.65) | <0.001 |
| SS | 0.88 (0.85-0.92) | <0.001 |
| SLE | 0.48 (0.46-0.5) | <0.001 |
| APS | 0.74 (0.68-0.82) | <0.001 |
| Palindromic rheumatism | 1.3 (1.19-1.42) | <0.001 |
| SSc | 0.92 (0.83-1.01) | 0.082 |
| MCTD | 0.82 (0.71-0.93) | 0.003 |
| Behcet’s disease | 1.44 (1.29-1.62) | <0.001 |
| PMR | 1.19 (1.04-1.35) | 0.009 |
| IIM | 0.85 (0.73-0.98) | 0.023 |
| Systemic vasculitis | 1.27 (0.95-1.69) | 0.108 |
| AOSD | 1.41 (1.05-1.89) | 0.022 |
| AS | 1.2 (0.85-1.69) | 0.297 |
| PsA | 2.48 (1.44-4.26) | 0.001 |
| Relapsing polychondritis | 2.57 (0.37-18.06) | 0.342 |
| Concomitant medication |  |  |
| csDMARDs | 1.26 (1.22-1.31) | <0.001 |
| Immunosuppressant | 0.68 (0.64-0.72) | <0.001 |
| Glucocorticoid | 0.88 (0.85-0.91) | <0.001 |
| Biological agents | 1.18 (0.86-1.64) | 0.304 |
| Tamoxifen | 0.96 (0.59-1.54) | 0.852 |
| Comorbidities |  |  |
| Diabetes mellitus | 1.09 (1.05-1.14) | <0.001 |
| Hypertension | 0.95 (0.92-0.98) | 0.002 |
| Dyslipidemia | 1.1 (1.07-1.14) | <0.001 |
| COPD | 0.96 (0.92-1) | 0.045 |
| Malignancy | 1.06 (0.98-1.13) | 0.13 |
| Liver disease | 0.97 (0.93-1) | 0.037 |
| CKD | 0.86 (0.77-0.97) | 0.015 |
| CCI score |  |  |
| 0 | Ref |  |
| 1 | 0.94 (0.86-1.02) | 0.126 |
| 2 | 0.94 (0.87-1.02) | 0.163 |
| 3~5 | 0.97 (0.89-1.05) | 0.481 |
| ≥ 6 | 1.07 (0.96-1.18) | 0.208 |

**Notes:** * p-values were derived from Cox proportional hazards regression models

**Abbreviations:** HR, hazard ratio; CI, confidence interval; OCT, optical coherence tomography; HCQ, hydroxychloroquine; RA, rheumatoid arthritis; SS, Sjogren syndrome; SLE, systemic lupus erythematosus; APS, anti-phospholipid antibody syndrome; SSc, systemic sclerosis; MCTD, mixed connective tissue disease; PMR, polymyalgia rheumatica; IIM, idiopathic inflammatory myopathies; AOSD, Adult onset Still’s disease; AS, ankylosing spondylitis; PsA, psoriatic arthritis; csDMARDs, conventional synthetic disease modifying anti-rheumatic drugs; COPD, chronic obstructive lung disease; CKD, chronic kidney disease; CCI, Charlson Comorbidity Index.

**References**

12. Won S, Cho SK, Kim D, et al. Update on the prevalence and incidence of rheumatoid arthritis in Korea and an analysis of medical care and drug utilization. Rheumatol Int. Apr 2018;38(4):649–656. doi:10.1007/s00296-017-3925-9

13. Bae EH, Lim SY, Han KD, et al. Trend of prevalence and incidence of systemic lupus erythematosus in South Korea, 2005 to 2015: a nationwide population-based study. Korean J Intern Med. May 2020;35(3):652–661. doi:10.3904/kjim.2018.303

14. Kim H, Cho SK, Kim JW, et al. An increased disease burden of autoimmune inflammatory rheumatic diseases in Korea. Semin Arthritis Rheum. Jun 2020;50(3):526–533. doi:10.1016/j.semarthrit.2019.11.007

15. Bae KH, Hong JB, Choi YJ, et al. Association of Congestive Heart Failure and Death with Ankylosing Spondylitis : A Nationwide Longitudinal Cohort Study in Korea. J Korean Neurosurg Soc. Mar 2019;62(2):217–224. doi:10.3340/jkns.2018.0110

16. Hwang JJ, Shin SH, Kim YJ, et al. Epidemiology of Antiphospholipid Syndrome in Korea: a Nationwide Population-based Study. J Korean Med Sci. Feb 10 2020;35(5):e35. doi:10.3346/jkms.2020.35.e35

17. Ahn JK, Hwang J, Seo GH. Incidence and risk of developing rheumatic diseases in 19,724 patients with palindromic rheumatism in South Korea: A nationwide population-based study. Joint Bone Spine. May 2021;88(3):105128. doi:10.1016/j.jbspin.2020.105128

18. Lee YB, Lee JH, Lee SY, et al. Association between smoking and Behcet's disease: a nationwide population-based study in Korea. J Eur Acad Dermatol Venereol. Nov 2019;33(11):2114–2122. doi:10.1111/jdv.15708

19. Ahn SS, Han M, Yoo J, et al. Risk of Cancers in Antineutrophil Cytoplasmic Antibody-Associated Vasculitis: Results from the Korea National Health Insurance Claims Database 2010-2018. J Clin Med. Nov 5 2019;8(11)doi:10.3390/jcm8111871

20. Park SJ, Kim HJ, Park H, et al. Incidence, prevalence, mortality and causes of death in Takayasu Arteritis in Korea - A nationwide, population-based study. Int J Cardiol. May 15 2017;235:100–104. doi:10.1016/j.ijcard.2017.02.086

21. Ji J, Dimitrijevic I, Sundquist J, Sundquist K, Zoller B. Risk of ocular manifestations in patients with giant cell arteritis: a nationwide study in Sweden. Scand J Rheumatol. Nov 2017;46(6):484–489. doi:10.1080/03009742.2016.1266030

22. Nossent J, Raymond W, Keen H, Preen DB, Inderjeeth CA. Adult-onset Still's disease in Western Australia: Epidemiology, comorbidity and long-term outcome. Int J Rheum Dis. Nov 2022;25(11):1306–1314. doi:10.1111/1756-185X.14424
